# Supplementary material for: Chemical Profile and Bioactivity of Rubus idaeus L. Fruits Grown in Conventional and Aeroponic Systems
Source: MDPI journal article supplement (doi:10.3390/plants13081115), 2024-04-16
Supplement: s1 [file s1]

# Supplementary Materials

Article

## Chemical Profile and Bioactivity of *Rubus idaeus* L. Fruits Grown in Conventional and Aeroponic Systems

Chiara La Torre <sup>1</sup>, Monica R. Loizzo <sup>1</sup>, Luca Frattaruolo <sup>1</sup>, Pierluigi Plastina <sup>1</sup>, Antonio Grisolia <sup>2</sup>, Biagio Armentano <sup>3</sup>, Maria Stella Cappello <sup>4</sup>, Anna Rita Cappello <sup>1</sup> and Rosa Tundis <sup>1,\*</sup>

<sup>1</sup> Department of Pharmacy, Health and Nutritional Sciences, University of Calabria, 87036 Rende (CS), Italy; rosa.tundis@unical.it (R.T.); monica\_rosa.loizzo@unical.it (M.R.L); annarita.cappello@unical.it (A.R.C.); luca.frattaruolo@unical.it (L.F.); chiara.latorre@unical.it (C.L.T.); pierluigi.plastina@unical.it (P.P).

<sup>2</sup> Azienda Agricola Grisolia A. – Contrada Campotenese sn - 87016 Morano Calabro (CS), Italy; grisoliantonio@gmail.com (A.G.).

<sup>3</sup> Azienda Agricola Armentano F. - Contrada Campotenese, n. 64 - 87016 Morano Calabro (CS), Italy; biagio30@live.it (B.A.).

<sup>4</sup> CNR, Institute of Science of Food Production (ISPA), 73100 Lecce, Italy; maristella.cappello@ispa.cnr.it (M.S.C.).

\*Correspondence: rosa.tundis@unical.it (R.T.); Tel.: +39-0984-493246.

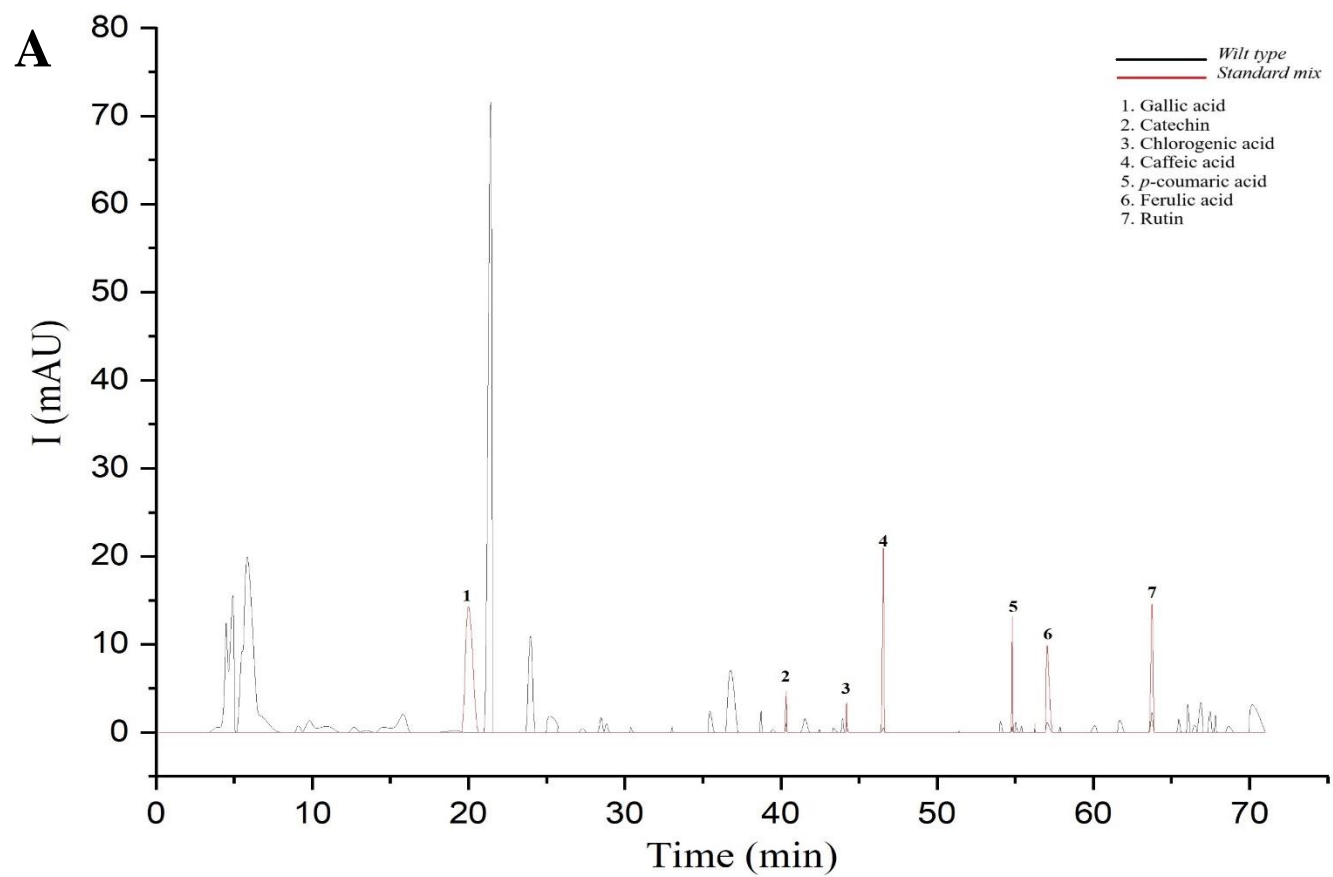

**B**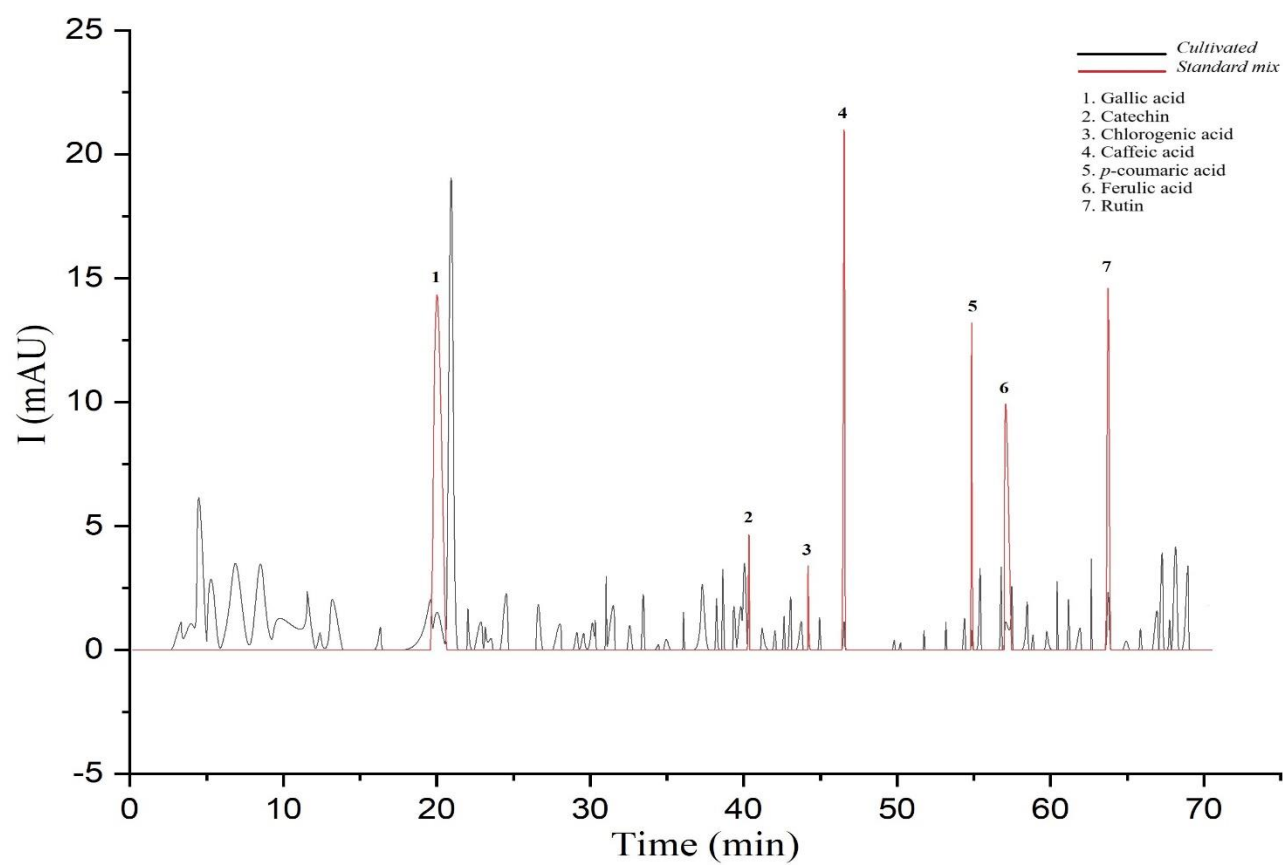

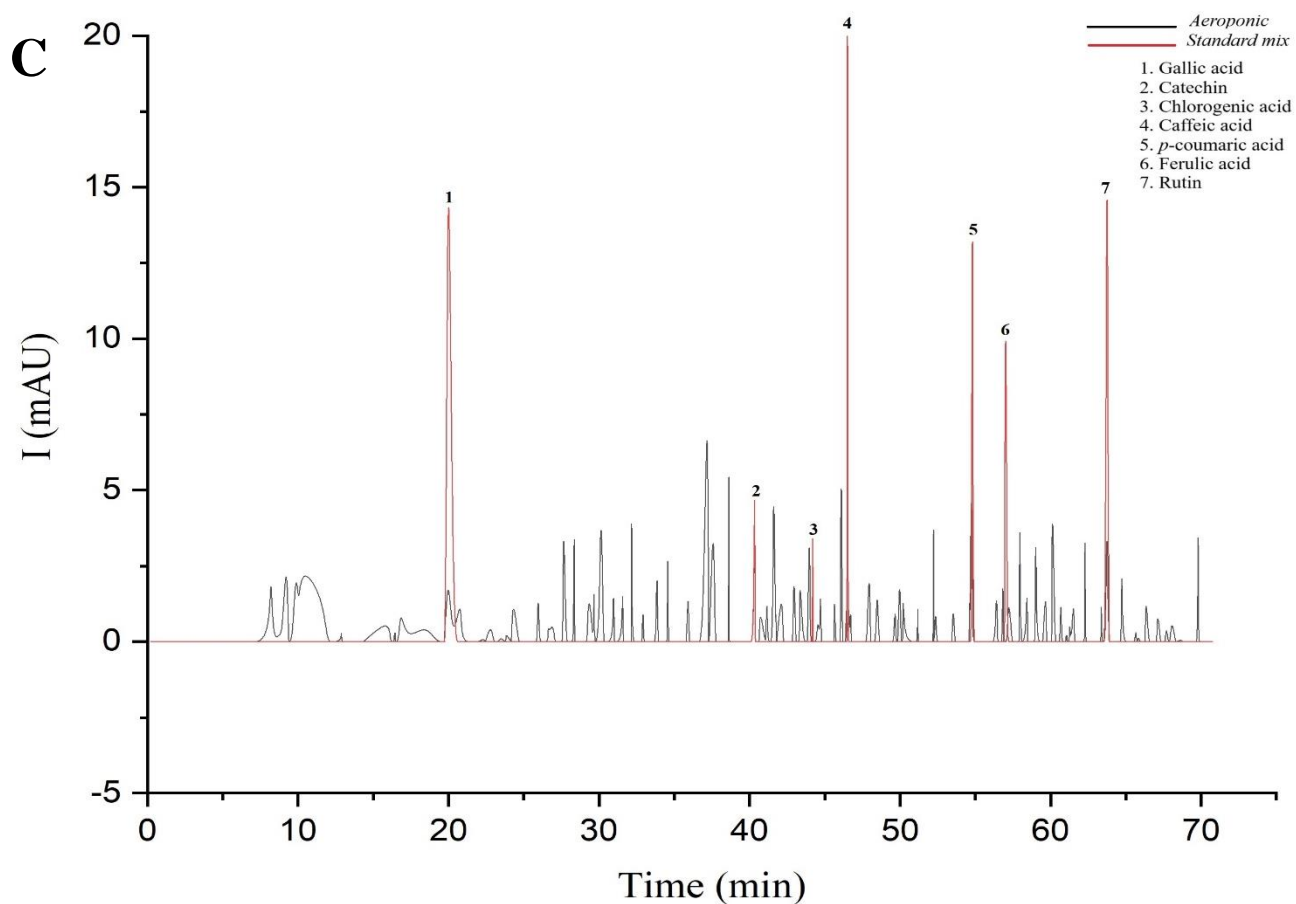

**Figure S1.** Chromatograms of raspberry extracts in ethanol. A: wild type, B: cultivated, C: aeroponic. All chromatograms were reported at a wavelength of 280 nm and overlapped with a standard mixture. Phenolics were qualified and quantified at different wavelengths, with respect to their maximum absorbance wavelengths. 1. gallic acid at 270 nm; 2. caffeic acid at 273 nm; 3. catechin at 280 nm; 4. *p*-coumaric acid at 310 nm; 5. ferulic acid at 325 nm; 6. chlorogenic acid at 327 nm, 7. rutin at 360 nm.

| Calibration range: 0.001 - 1 mg/mL |                                               |
|------------------------------------|-----------------------------------------------|
| Standard                           | Calibration curve                             |
| <i>Caffeic acid</i>                | $y=1.854473e^{-5} + 35.77557$ ; $R^2= 0.982$  |
| <i>Chlorogenic acid</i>            | $y=3.601749e^{-5} + 65.25935$ ; $R^2= 0.993$  |
| <i>Ferulic acid</i>                | $y=2.2515792e^{-5} + 36.49947$ ; $R^2= 0.990$ |
| <i>Gallic acid</i>                 | $y=3.316615e^{-5} + 56.08516$ ; $R^2= 0.999$  |
| <i>p-Coumaric acid Catechin</i>    | $y=1.239896e^{-5} + 32.64989$ ; $R^2= 0.993$  |
| <i>Quercetin-3-O-rutinoside</i>    | $y=1.162342e^{-4} + 37.63891$ ; $R^2= 0.984$  |
|                                    | $y=8.602372e^{-5} + 65.9654$ ; $R^2= 0.999$   |

**Figure S2.** Calibration curve of phenolics used as external standards.
